# Supplementary material for: Retraction: Muñoz, H. (2011). “Metodología para el Diagnóstico de la Sostenibilidad de Empresas de Servicios Públicos.” J. Constr. Eng. Manage. , 10.1061/(ASCE)CO.1943-7862.0000470 (Aug. 17, 2011)
Source: Atypon-hosted journal article supplement (doi:10.1061/(asce)co.1943-7862.0000847), 2014-02-03
Supplement: retracted_manuscript_co.1943-7862.0000470.pdf [file retracted_manuscript_co.1943-7862.0000470.pdf]

## **RETRACTED: Metodología para el diagnóstico de la sostenibilidad de empresas de servicios públicos**

Holger Benavides Muñoz<sup>(1)</sup>

(1) Profesor Principal de la Unidad de Ingeniería Civil, Geología y Minas – UCG - UTPL

Docente investigador de la Universidad Técnica Particular de Loja.

San Cayetano Alto, C/París, 1101608, Loja, Ecuador. E-mail: hmbenavides@utpl.edu.ec

---

**Resumen:** A través de este trabajo se presenta una metodología que permite diagnosticar la sostenibilidad de una empresa de servicios públicos, con base en la evaluación técnica -mediante indicadores-, que luego son agregados cuali - cuantitativamente en un índice que reúne las propiedades y características de la empresa; dicho valor, implícitamente compara los estados particulares de calidad y su equilibrio global deseado.

El índice de sostenibilidad de empresas de servicio público – *ISEM* –, (*ISA para abastecimientos de agua*) es el resultado numérico, analíticamente trazable, de la combinación de una proposición convergente que asocia la interacción entre los aspectos: social, económico y ambiental. El proceso de agregación, en su componente cualitativo, requiere de la vinculación de experiencias y criterios participativos de expertos e involucrados en la gestión de este tipo de empresas, recopilados mediante entrevistas técnicas - Delphi. La exactitud y veracidad del componente cuantitativo, en cambio, depende de los datos proporcionados por el equipo gestor o gerencial.

La metodología *ISEM*, nace con el propósito de convertirse en una herramienta útil para la orientación en la planificación y toma de decisiones del grupo político, sujetos financieros, entes de auditoría técnica y el propio cuerpo director y gerencial de la empresa de servicio público, de una forma simplificada, potente y práctica. Asimismo, la presentación gráfica de los resultados del diagnóstico *ISEM*, exhibe su estructura constitutiva, facilita su desagregación para la identificación de patologías en la gestión y promueve la selección y priorización participativa de medidas correctoras.

**Palabras clave:** Diagnóstico, sostenibilidad, empresas de servicio público, gestión.

---

## Introducción

El desarrollo sostenible o sostenibilidad, alberga los aspectos de la actividad humana que fortalece su crecimiento económico, con equidad y bienestar social, de tal modo que contribuye al mejoramiento de la calidad de vida de los individuos, presentes y futuros, sin contaminar el ambiente. Así, toda actividad humana que es sustentable puede o no ser sostenible; en cambio, todo lo que es sostenible necesariamente debe ser sustentable primero.

Uno de los primeros conceptos del desarrollo sostenible es que “satisface las necesidades de la generación presente sin comprometer la capacidad de las generaciones futuras para satisfacer sus propias necesidades”. (CISDL 2005), (Macedo B. 2005), (Segger C. & Khalfan A. 2004). En este marco, y con referencia al *Plan Especial de Indicadores de Sostenibilidad Ambiental de la Actividad Urbanística de Sevilla 2007*, (OSE 2008), se puede decir entonces que una empresa de servicio público es sostenible cuando consigue la máxima eficiencia en el aprovechamiento de los recursos – *económicos, sociales y ambientales*– con la mínima alteración de los ecosistemas implicados, tras satisfacer –*en cantidad y calidad*– la demanda de los usuarios, en todo espacio y tiempo; y, cuyos ingresos por tarifas, gravados a los bienes ó servicios que brinda, cubren en el tiempo al menos la totalidad de sus costos.

Buscar la sostenibilidad en la gestión de empresas que brindan servicios públicos es indiscutiblemente importante, sin embargo, en países como el nuestro (Ecuador) más que necesaria, resulta apremiantemente esencial, dadas las condiciones administrativas, políticas y físicas en las que una gran mayoría de sistemas y empresas de servicio público se hallan; por tal motivo, existe el interés por la búsqueda de alternativas que permitan optimizar la utilización de los recursos que se invierten, en las propias empresas operadoras, en sus administradores y clientes, en la clase política y gobernante, también en los organismos financieros locales e internacionales y en los entes

reguladores involucrados; pues, incluir el tema de sostenibilidad en el quehacer de este tipo de empresas es el fin perseguido desde hace varios años por la sociedad, para mejorar entre otras cosas su calidad de vida.

## **Objetivo**

El objetivo de este estudio es establecer una metodología que posibilite evaluar la sostenibilidad - económica, social y ambiental- en las empresas de servicio público, (caso práctico hacia los abastecimientos de agua potable), mediante la agregación cuali-cuantitativa de sus componentes, para convertirla en una herramienta de apoyo a los decisores políticos, entes financieros y gerencias involucradas en la gestión de empresas operadoras.

## **Metodología**

De los métodos particulares que existen para desarrollar una investigación exploratoria en este trabajo se utiliza el método experimental y deductivo, que luego de una indagación documentada se la aplica (para el presente caso de estudio) en las empresas que ofrecen servicio de agua para consumo humano.

En este sentido, la investigación se ubicó en un campo de estudio que evolucionó de forma práctica en múltiples sistemas de agua del Ecuador; este suceso, flexible y positivamente cambiante, permitió converger de forma gradual y sistemática en el resultado que aquí se comparte.

El planteamiento que se adopta para desarrollar la metodología de diagnóstico de la sostenibilidad de empresas de servicio público, es el siguiente:

- a) Responder las preguntas:
  - a. ¿Qué constituye una empresa sostenible?
  - b. ¿Cómo se puede obtener aquellos resultados de sostenibilidad?
  - c. ¿Cuáles son los factores y restricciones locales que limitarán o potenciarán el éxito?
  - d. ¿Con qué variables e indicadores se puede verificar los cometidos?
- b) Organizar y asociar los indicadores seleccionados, por componentes y subcomponentes.

- c) Desarrollar los aspectos cualitativos del método, mediante entrevistas técnicas guiadas (también denominadas entrevistas Delphi)
  - a. Distribución de importancias ponderadas (**IP**) de los indicadores.
  - b. Obtención de las funciones de conversión de los indicadores a unidades isométricas, mediante funciones que involucran factores de calidad (**FC**).
- d) Calcular el índice de sostenibilidad de empresas de servicio público –**ISEM**–.
- e) Emitir un diagnóstico de la empresa con base en el **ISEM**.
- f) Facilitar la comprensión del diagnóstico, mediante la visualización del valor del **ISEM**, mediante gráficos *tela de araña*.
- g) Priorizar las medidas correctoras, mediante la matriz de selección de alternativas.
- h) Proponer un plan de mejoras y medidas correctoras.

En la figura 1, se esquematiza la estructura conceptual del modelo **ISEM** que para un abastecimiento de agua se denominó –**ISA** (*Índice de Sostenibilidad de Abastecimiento*).

### **Cálculo del Índice de Sostenibilidad de Empresas - ISEM**

El método **ISEM** (ó **ISA** para abastecimientos de agua), es una herramienta para la evaluación del nivel de sostenibilidad de la empresa, que se sujeta a la información y datos generados por el propio gestor, (según ecuación 01) y que requiere de la medición continua de variables e indicadores –en la etapa de valoración–, los que luego se transforman a través de funciones de conversión, en factores de calidad (**FC**), cifras comparables –isométricas– que son afectadas por importancias ponderadas (**IP**) y convertidos en pesos relativos (**PR**), según la ecuación 02. (Benavides 2010).

$$ISA = \sum PR_j \quad \text{[Ec. 01]}$$

Donde:

**PR<sub>j</sub>** - peso relativo del indicador **j**

Existe un peso relativo (***PR***) para cada indicador ***j***. El ***PR*** se obtiene al multiplicar el factor de calidad (***FC***) con la importancia ponderada (***IP***) correspondiente. El componente social y el componente ambiental, cada una, tienen importancias ponderadas subtotales de **33.3** (adimensional) y el componente económico de **33.4** (también adimensional), ver tabla 1. La sumatoria de todas las ***IP*** es igual a **100**. De tal manera que el ***ISEM*** (ó ***ISA***) podrá tener valores entre 0 y 100.

Una vez se tiene calculado el indicador de sostenibilidad de la empresa, con apoyo de la tabla 2 se puede diagnosticar el estado de sostenibilidad de la empresa; así por ejemplo, para un abastecimiento en excelentes condiciones de sostenibilidad le corresponde un ***ISA*** mayor que 90 hasta 100 inclusive; (*Benavides 2010*), dicha situación deseable se puede ver en la figura 2.

La aplicación del diagnóstico de sostenibilidad mediante el ***ISEM*** (ó ***ISA***) permite a los gestores, grupos externos de financiamiento, y sociedad involucrada a las empresas (abastecimientos) idealizar, según la caracterización que sea asignada, el grado de sostenibilidad de su entidad; con dicha clasificación se presenta, de forma gráfica y numérica, la situación en la que se encuentra su institución ó abastecimiento (un ejemplo de este tipo de resultados se puede observar en la figura 3) y con base en los valores de los subcomponentes (operativo, formativo, comercial, autogestión, operación y mantenimiento, índices financieros,..., etc. según la tabla 3), podrán incluir los controles adecuados y orientar la toma de decisiones correspondientes para mejorar dicha situación, fundamentándose en los criterios técnicos involucrados en ésta (tales como planificar, rediseñar e invertir, todo bajo el horizonte de la sostenibilidad).

$$PR_j = FC_j \times IP_j \quad \text{[Ec. 02]}$$

Donde:

- PR<sub>j</sub>*** - peso relativo del indicador ***j***
- FC<sub>j</sub>*** - factor de calidad del indicador ***j***
- IP<sub>j</sub>*** - importancia ponderada del indicador ***j***. Ver tabla 3.

El factor de calidad (*FC*) para cada indicador, es el resultado de la transformación del valor del indicador mediante su correspondiente función de conversión, en un número representativo de la calidad sostenible del abastecimiento (entre 0 y 1), según ecuación 03, para ello se toma en consideración las características deseadas –*sostenibles*– para cada indicador, con base en normas de calidad o criterios técnicos (entrevistas técnicas guiadas - Delphi), de un estado propicio o anhelado. De este modo, los parámetros de calidad se pueden llegar a comparar y sumar, por ser isométricos ó confrontables. (*Benavides 2010*).

El *FC* depende de la **función de conversión** [ $f(Ind_j)$ ] que caracteriza a cada indicador.

$$FC_j \rightarrow f(Ind_j) \quad [\text{Ec. 03}]$$

Los 49 indicadores planteados, en esta oportunidad para empresas de abastecimientos de agua potable del Ecuador, se agrupan en 15 subcomponentes, que a su vez forman los componentes: social, económico y ambiental. El componente social cuenta con 16 indicadores distribuidos en 6 subcomponentes, el componente económico cuenta con 22 indicadores agrupados en 5 subcomponentes; y, el componente ambiental lo conforman 12 indicadores reunidos en 4 subcomponentes. Información que se detalla en la tabla 3.

## **Componentes cualitativos de la metodología *ISEM* (ó *ISA*)**

### ***a) Entrevistas técnicas guiadas***

Para los aspectos cualitativos, que estructuran una parte del presente trabajo, se toma como instrumento para la recolección de información de expertos y experiencias de los involucrados en la gestión de sistemas de abastecimiento, las entrevistas técnicas personales ó también denominadas entrevistas Delphi, (*Baldivieso 2002*). Esta herramienta, permite recabar y agrupar parte del conocimiento de la memoria colectiva, relacionada con un tema en específico; en nuestro caso –la gestión de abastecimientos urbanos–. (*Benavides 2010*).

El desarrollo de las entrevistas técnicas (Delphi) se puede visualizar en la figura 4, y se

esquematiza narrativamente de la siguiente manera:

El proceso inicia con organizar los aspectos significativos que conforman el guión de la entrevista (la parrilla básica de los indicadores y la escala de calidad), el paso siguiente es la socialización del tema con cada técnico y gestor involucrado, al tiempo que se efectúa la selección de expertos - *aquellos que por su conocimiento y experiencia puedan aportar significativamente para los intereses del estudio*-. A los expertos seleccionados, se les aplica la entrevista, (se obtienen mejores resultados si se lo hace de forma directa y con las debidas explicaciones en aquellos aspectos que lo requieren). Una vez que se cuente con los resultados de la entrevista, se promedia estos valores y posteriormente se las utiliza según corresponda. Cuando el nivel de conocimiento y experiencia difiere significativamente entre los expertos consultados (lo cual no es nuestro caso), se puede ponderar sus respuestas por pesos que reflejen esas brechas de pericia y práctica. (Benavides 2010).

Las importancias ponderadas (IP) que se presentan en este estudio, son el resultado de la aplicación de entrevistas técnicas (Delphi) a doce involucrados en la gestión de abastecimientos urbanos de nuestra región; de ellos, el 67% aportaron con datos para la creación de las funciones de conversión, según se muestra como ejemplo en la figura 5.

#### ***b) Importancias ponderadas***

Para la distribución de importancias ponderadas (IP) se presenta la parrilla con los 49 indicadores que se consideran pertinentes, tanto para los entrevistados, expertos, gestores y el autor.

Los criterios de distribución aritmética que se plantean, para direccionar de forma general la asignación de importancias, fueron las siguientes:

- El valor que se asigne a cada indicador, debe ser aquel que responda a la pregunta:  
*Según su experiencia y conocimiento, ¿cuánto peso tiene “este” indicador respecto del total (100) para alcanzar la sostenibilidad del abastecimiento?*
- La suma de cada uno de los tres componentes, debe ser un tercio del total; esto significa, un valor de 33.3 para los componentes social y ambiental, y un valor de 33.4 para el económico.

Es decir que la suma total debe dar un valor de 100. Ver tablas 1 y 2.

- La suma de los valores asignados a los indicadores, conforman el valor del subcomponente al cual pertenecen.
- Los valores se deben escribir con una cifra decimal.
- No se admiten ni valores negativos, ni nulos.

El resultado del procedimiento Delphi, para la distribución de importancias ponderadas, se presenta en la tabla 3.

### **Clasificación de los abastecimientos según su *ISA***

La presente propuesta de clasificación de las empresas de suministro de agua según su sostenibilidad, con base en el *ISA*, es una evolución simplificada de las escasas proposiciones existentes al respecto; entre ellas por ejemplo, la propuesta denominada *Barómetro de la Sostenibilidad*, la misma que en cinco intervalos fijos relaciona en el eje de las ordenadas el *bienestar del ecosistema* y en el eje de las abscisas el *bienestar humano*. (UICN 2002).

Para la propuesta de clasificación de los abastecimientos con base en su *ISA*, se analiza en términos comparables –isométricos– la calidad de gestión en lo social, económico y ambiental, concatenado con los aspectos vulnerables de la empresa y los niveles deseables –en cantidad y calidad– para el usuario, según rangos generales que varían así: 0%, 40%, 60%, 75%, 90% y 100%, dichos porcentajes fueron el resultado de la comparación de experiencias y referencias (sociales, económicos y ambientales) hasta ahora sentidas en los abastecimientos de agua investigados y proyectados a una situación deseable, tanto para la empresa, como para el usuario. Las categorías de valoración de la sostenibilidad de cada componente de la sostenibilidad se muestran en la tabla 1.

Las categorías de estado de sostenibilidad son cinco (ver tabla 2); como se puede observar, para un *ISEM* (ó *ISA*) cuyo valor está dentro del rango de cero a cuarenta se lo categoriza como: “empresa ó abastecimiento con estado de sostenibilidad **malo**”; un valor de *ISEM* (ó *ISA*) mayor



que cuarenta y hasta sesenta se lo denomina “empresa ó abastecimiento con estado de sostenibilidad **deficiente**”; para valores de *ISEM* (ó *ISA*) mayor que sesenta y hasta setenta y cinco se lo conoce como “empresa ó abastecimiento con estado de sostenibilidad **regular**”; aquellas empresa ó sistemas de agua con un *ISEM* (ó *ISA*) mayor que setenta y cinco y hasta noventa se dice que es una “empresa ó abastecimiento con estado de sostenibilidad **bueno**”; y, aquellas empresas cuyo valor de *ISEM* (ó *ISA*) es mayor que noventa y hasta cien inclusive, se trata de una “empresa ó abastecimiento con estado de sostenibilidad **excelente**”.

La evaluación y diagnóstico de la sostenibilidad de una empresa es un proceso continuo, permanente, sistemático y cada vez más exigente, durante cada fase y cada componente; dicho ciclo propuesto se muestra en la figura 6. Antes de una nueva etapa de planificación y organización de actividades en la gestión de la institución ó abastecimiento, es preciso conocer la situación (socio-económico-ambiental) de partida, denominada *ISA*<sub>INICIAL</sub>, AÑO CERO. Este diagnóstico inicial tiene como propósito verificar el nivel de sostenibilidad en el que se encuentra la empresa y su sistema de servicio público, con el fin de remediar toda patología que se detecte y evitar así un detrimento mayor, con el uso y el tiempo, de sus elementos constitutivos.

Dadas estas características, el diagnóstico de sostenibilidad no sólo “puntúa” en términos comparables la calidad de gestión en lo social, económico y ambiental, sino que pone de manifiesto los puntos vulnerables de tal actividad, al tiempo que permite focalizar el origen de algunos de los problemas o necesidades existentes y que ameritan más atención por parte de los actores involucrados, convirtiéndose en el instrumento base para la toma de decisiones y que orienta una proposición de las directrices de actuación para la mejora sistemática-preceptiva del desempeño. Así, los intervalos numéricos propuestos en la clasificación, implican una asignación de estado de sostenibilidad que facilita su interpretación, desagregación y trazabilidad para la organización del plan de mejora y selección de medidas correctoras.

El proceso, tal como aquí se anota, se debe aplicar de manera constante; así, una vez que se

obtiene los resultados de una primera intervención **ISA** INICIAL, AÑO 0, vendrá luego el diagnóstico **ISA** AÑO 1, **ISA** AÑO 2, **ISA** AÑO 3, ... **ISA** AÑO n.

## Funciones de conversión

Las funciones de conversión permiten transformar los valores de los indicadores a factores de calidad (ó unidades isométricas). Existe una función de conversión para cada indicador.

La *función de conversión* es explícita y tiene como variable independiente a la magnitud del indicador (dato proporcionado por el gestor de la empresa). (Benavides 2010).

### ***El proceso de elaboración de las funciones de conversión.***

Las funciones de conversión se elaboran con base en los pares ordenados que son proporcionados por los expertos (mediante entrevistas técnicas guiadas - Delphi) bajo el marco de los criterios generales siguientes:

- El valor que se asigne a cada par ordenado (como cifra de penalización del valor del indicador, en tanto y en cuanto éste se aleje del valor ideal y/o sostenible del indicador), debe ser aquel que responda a las preguntas:

*¿Qué valor del indicador en cuestión le corresponde una calidad máxima de 1.0?*

*¿Qué valor del indicador en cuestión le corresponde una calidad de 0.8?*

Del mismo modo, para las calidades de 0.6, 0.4, 0.2.

*¿Qué valor del indicador en cuestión le corresponde una calidad mínima considerada de 0.0?*

- Los valores se deben escribir con una cifra decimal y no se admiten valores negativos.

Una vez que se obtienen -para cada indicador- los valores medios y sus correspondientes valores de calidad, se dibujan dichos puntos en un sistema coordenado (X - Y), (ver figura 5), seguidamente los pares de datos de la gráfica así obtenida se ajustan por tanteos hasta conseguir que la función resultante adquiera una tendencia lo más próxima a aquella conseguida por regresión (exponencial,

lineal, logarítmica, polinómica o potencial), tal que su coeficiente de determinación ( $R^2$ ) sea igual a uno (denominada entonces relación perfecta). En el presente caso de estudio, se tienen 49 indicadores y es necesario utilizar igual número de funciones de conversión.

Para la asignación de los valores de los pares ordenados en cada función de conversión se toma como apoyo y referencia: Normas y literatura técnica relacionada, algunos conceptos económicos del Banco del Estado (Ecuador), criterios y experiencias de expertos y gestores, apuntes personales del autor; y, comparadas con situaciones deseables, casi “idílicas” para los abastecimientos de agua de las zonas de estudio.

### **Aplicación de la metodología de diagnóstico de la sostenibilidad**

El diagnóstico de un abastecimiento de agua, debe ser un proceso continuo para conocer el estado de sostenibilidad del sistema hídrico, mediante una calificación cuali-cuantitativa que permita establecer sus patologías (administrativas, legales; económicas - de infraestructura; y, ambientales) que son advertidas luego de un análisis comparativo de datos (sociales, económicos y ambientales) pertenecientes al suministro de agua. El término patología aquí se lo interpreta como el conjunto de fenómenos, inconsistencias y no conformidades, que afectan las condiciones que le dan sostenibilidad a un abastecimiento de agua. Una patología requiere de un plan de mejora, que implica el conjunto de acciones e intervenciones sistemáticas para disminuir y hasta eliminar aquellas que afectan a las empresas ó sistemas de agua. En la ejecución del plan se ordenan las medidas por su: urgencia, importancia y obligatoriedad; y/o, según el menor valor del factor de calidad de la sostenibilidad.

#### ***Recuento narrativo de los pasos para el cálculo del ISA (agregación):***

- i) Calcular los indicadores, con la combinación de las variables, provenientes de los datos proporcionados por el gestor del abastecimiento mediante encuesta, en las ecuaciones dadas para cada indicador.

- ii) Determinar el factor de calidad (FC), para ello existe la posibilidad de proceder de dos maneras, una de forma gráfica y otra de forma matemática. Para la primera de ellas, se ingresa en el eje de las abscisas con el valor del indicador, se interseca en el punto de la función correspondiente y el valor del FC se lee de la proyección en el eje de las ordenadas. En cambio, para el método matemático se emplean directamente las respectivas ecuaciones y funciones.
- iii) Obtener el “peso relativo de cada indicador” al multiplicar el FC con el valor de la “importancia ponderada” del indicador, según la tabla 3.
- iv) Calcular el “peso relativo de cada subcomponente”, como la sumatoria de los pesos relativos de los indicadores que lo conforman. A este valor se lo convierte en porcentaje para más adelante incluirlo en el gráfico de “tela de araña”. (Ver tabla 4).
- v) Sumar los “pesos relativos de los subcomponentes” para determinar el “peso relativo de cada componente”. Su puntuación puede estar entre 0 y 33.3 (33.4 para el económico).
- vi) Finalmente, el *ISA* (índice de sostenibilidad del abastecimiento) es la suma de los pesos relativos de los tres componentes; suma que, como ya se anotó, puede ubicarse en el rango de 0 a 100.

### ***Consideraciones sistémicas***

La metodología *ISA* considera los siguientes aspectos:

#### ***a) Valoración***

Es la primera fase de exploración, en la que se estructura la línea base del sistema, en los aspectos social, económico y ambiental. Incluye: recolección de información, completa, verificable y organizada, se recogen además los criterios y datos de archivo de los que dispongan los involucrados (directores, ingenieros, administrativos, coordinadores técnicos, personal de campo, etc.). Así,

entonces, la valoración es la fase en la cual se recaba, de la fuente de información (encuestados-entrevistados), la mayor cantidad de datos y cifras de las variables e indicadores que componen la malla de subcomponentes.

El método de investigación que se recomienda para recabar datos e interrogar (mediante diálogo técnico) a los encargados y gestores del abastecimiento, es *la encuesta*. Para el presente caso de estudio se plantea una encuesta con 86 preguntas; 40 de ellas formuladas para el componente económico, 25 para el componente social y 21 para el componente ambiental. Cada pregunta representa una variable, necesaria para el cálculo de los indicadores. Por citar un ejemplo, se debe combinar las variables (ó respuestas de las preguntas de la encuesta) 1 y 2 para el cálculo del indicador “autosuficiencia financiera”.

*b) Diagnóstico ISA*

La fase del diagnóstico *ISA* debe contemplar los siguientes aspectos:

- Adaptar los juicios de valor a la realidad de cada gestor “*in situ*”.
- Establecer el umbral y el techo deseables para mejorar la sostenibilidad, con base en las mejores prácticas, normativas, experiencias, tiempo y financiamiento disponibles; y, proyectarse hacia la mejora del desempeño, en los tres componentes de la sostenibilidad, dentro de un marco de gobernanza y responsabilidad política.
- Explicar de forma permanente la importancia del proceso de diagnóstico a los productores, administradores, analizadores y custodios de los datos e información del sistema de agua.
- Especificar a los directivos de la empresa en estudio, la necesidad de invertir tiempo y recursos para el diagnóstico continuo.
- Compartir, analizar, criticar, aceptar, apoyar y transferir los resultados del diagnóstico de forma participativa y proactiva.

Es así que, una vez recabados los datos de las encuestas (las variables), se calculan los índices ó indicadores, posteriormente se determinan los factores de calidad, para seguidamente calcular los

pesos relativos de cada subcomponente y componente, de cuya sumatoria, finalmente, se obtiene el *ISA*.

c) *Caracterización*

Con el valor del *ISA* (de la fase anterior), se clasifica el abastecimiento por su nivel de sostenibilidad, según corresponda al rango numérico que se establece para dicho propósito.

*Caso de estudio*

a) *Cálculos*

Como presentación del caso de estudio, se muestra un ejemplo detallado de cálculo para uno de los abastecimientos investigados. En las tablas 4 y 5 se ordena el procedimiento de cálculo antes anotado y se expone los resultados del componente económico del diagnóstico, allí se puede observar que el *ISA\_económico* en su escala de valoración original es de 11.2 y su equivalente porcentual corresponde a 33.5%, valor que marca un estado de *sostenibilidad económico malo*.

Del mismo modo, el *ISA\_social* que se obtuvo en su escala de valoración original es de 18.5 y su equivalente porcentual es 55.6%, cifra por la que se sitúa al abastecimiento en un estado de *sostenibilidad social deficiente*, dicho proceso se detalla en las tablas 6 y 7.

Asimismo, el *ISA\_económico* en su escala de valoración original es de 13.1 y su equivalente porcentual es de 39.2%, valor que lo ubica en un estado de *sostenibilidad ambiental malo*, resumido en las tablas 8 y 9.

Seguidamente se exhibe, a manera de ensayo, la conversión de un indicador a su factor de calidad

- *Número de empleados por cada 10000 abonados*

$$N_{EMP} = \frac{\text{Empleados}}{CliT} \times 10000 \quad [\text{Ec. 04}]$$

Donde:

- Empleados* - Número de empleados en la empresa (para agua potable y alcantarillado)
- CliT* - Acometidas totales

La función de conversión del número de empleados por cada 10000 abonados a factor de calidad es:

$$FC_{N_{EMP}} = -6.1439 E - 10 \times (N_{EMP})^6 + 2.2118 E - 07 \times (N_{EMP})^5 \\ - 3.1025 E - 05 \times (N_{EMP})^4 + 2.1376 E - 03 \times (N_{EMP})^3 \\ - 7.5446 E - 02 \times (N_{EMP})^2 + 1.3066 \times (N_{EMP}) - 8.75258816 \quad [\text{Ec. 05}]$$

$$\forall 20.0 \leq (N_{EMP}) \leq 90.0$$

Para el cálculo, primeramente se hace uso de la ecuación del indicador (en el presente caso la Ec. 04), de donde se obtiene que en la empresa existen 34.55 empleados por cada 10000 abonados. Se puede apreciar luego, en la figura 7, que para el valor del indicador (ingresado en el eje de las abscisas), le corresponde un factor de calidad (en el eje de las ordenadas) de 0.13.

Semejantemente, en el método matemático se emplea la función de conversión respectiva, (ecuación 05), de donde el FC es 0.1258.

En términos generales, si se quiere evaluar el número de empleados únicamente para agua potable, entonces el valor óptimo (para  $FC=1$ ) es de treinta por cada diez mil conexiones. Concomitantemente, existe como referencia para agua potable y alcantarillado 5.8 empleados / 1000 conexiones, (Arana E. 2002); y 3.0 empleados de agua potable / 1000 conexiones. (Cáceres V. 2008).

#### b) Diagnóstico

De los resultados de la agregación, se obtiene los siguientes pesos relativos (PR):  $PR_{Económico}$  de 11.17 ~ 33.5%;  $PR_{Social}$  de 18.53 ~ 55.6%; y,  $PR_{Ambiental}$  de 13.05 ~ 39.2%. Finalmente, el *ISA* para el abastecimiento investigado es de 42.75 semejante a 42.8, valor que sitúa, en términos globales, al abastecimiento en un nivel de *sostenibilidad deficiente*.

Con los valores porcentuales relativos de cada subcomponente se construyen los diagramas (tela de araña) del índice de sostenibilidad y sus componentes satélites, según se representa en la figura 3.

Para una mejor comprensión del caso, es preciso conocer que el presente instrumento de diagnóstico se aplicó en catorce sistemas de abastecimiento de agua potable y alcantarillado del Ecuador. Todos los abastecimientos investigados presentan valores del *ISA* inferiores a 50; y, con su

interpretación se emite el siguiente diagnóstico: **cuatro** de ellos se los clasifica como **abastecimientos de sostenibilidad deficiente** y **diez** como **abastecimientos de sostenibilidad mala**.

El extracto de estos resultados se los exhibe mediante la figura 8. También, en la figura 9, se comparan gráficamente los resultados del índice de sostenibilidad de las empresas de agua, con su índice de fugas estructural (IFE) y su recuperación de costos.

c) *Medidas correctoras*

Es visible en la figura 3, que el abastecimiento en análisis (caso de estudio mostrado) requiere que se consideren, por lo menos, las medidas correctoras siguientes:

- *Modificación administrativa.*- para once de los quince subcomponentes que están ubicados por debajo del 75%.
- *Evolución técnica.*- En lo social: principalmente para mejorar cobertura, calidad cantidad; en lo económico: infraestructura; y, en lo ambiental: conservación, aprovechamiento e impacto.
- *Ajuste y enmienda legal.*- deberán acompañarse los ajustes legales que correspondan, a nivel de ordenanzas o decretos del gobierno local.
- *Compensación.*- Principalmente los impactos ambientales, los financieros en lo económico y cobertura en lo social.
- *Restitución.*- se incluyen cobertura, calidad y cantidad, en el componente social.
- *Estímulo.*- Este tipo de medidas para los cuatro subcomponentes que están arriba del 75%.

## **Selección de prioridades**

Priorizar medidas correctoras se entiende como la acción de valorar y juzgar el orden sucesivo en las que se suscitarán, sin descartar ninguna. La técnica metodológica que se presenta es el resultado de la combinación de los métodos de priorización por **factores ponderados** con la del **árbol de decisiones**.

**Factores ponderados:** se basa en la valoración global mediante indicadores que a su vez se



afectan, de forma ponderada, por su importancia, (Pabón 2007); de tal modo que, cada indicador aporta un peso relativo al valor final del *ISEM* (ó *ISA*). Es así, tal que se considera como el más crítico a corregir aquel que tiene el menor porcentaje relativo de todos los presentados en el diagrama satélite de *tela de araña*, (ver figura 3).

**Árbol de decisiones:** La técnica se sustenta en valores que provienen de sus raíces (datos de las variables e indicadores), que estructuran los subcomponentes; y, éstos dan lugar a los componentes. La suma de los tres componentes finalmente aflora en la parte superior del árbol con el valor del *ISEM* (ó *ISA*, según corresponda).

Bien en el proceso de diagnóstico de la sostenibilidad de las empresas, ó bien en un determinado momento de la planificación o ejecución de las medidas correctoras dentro de la empresa operadora del servicio, el gestor y su equipo pueden toparse con que la valoración ponderada relativa de cada indicador (señalado por su *ISEM* ó *ISA*) no es un valor determinante para decidir qué subcomponente es crítico, ó cuál actividad se debe ejecutar primero, ó resulta impreciso por parecer tareas totalmente independientes entre sí (aunque casi nunca excluyentes); entonces, es cuando se puede apoyar dicha tarea de selección y gestión de prioridades mediante la *matriz de selección de prioridades* según su *urgencia, obligatoriedad o importancia*.

**Matriz de selección de prioridades.-** Descripción del método propuesto (combinación del ABC y por pares), (Benavides 2010).

- 1) Organizar una matriz cuadrada, cuyo orden ( $n \times n$ ) está determinado por el número de indicadores (subcomponentes o actividades) que se desea priorizar.
- 2) Escribir los indicadores (subcomponentes o actividades) a priorizar, de arriba abajo (forman columna) y de izquierda a derecha (forman fila), en ambos casos conservan la misma secuencia.
- 3) Llenar con ceros la diagonal principal.

- 4) Comparar el indicador de cada fila con el de cada columna; considerar aquellas que se ubican de la diagonal de ceros hacia la derecha, mediante la pregunta: *¿El indicador (o actividad o subcomponente) de la fila es más urgente, más importante y más obligatorio que el indicador de la columna?*

El valor que se anota en la celda o casilla que conforma la intersección de las filas y columnas en donde se alojan los indicadores cuestionados, puede ser un número de 0 hasta 3, según corresponda al siguiente detalle de posibles respuestas:

Si no es más urgente, ó ni más importante, ó ni más obligatorio, entonces **0**.

Si sólo es más urgente, ó sólo más obligatorio, ó sólo más importante, **1**.

Si es más urgente y más obligatorio; ó, es más urgente y más importante, **2**.

Si es las tres cosas al mismo tiempo, consignamos un **3**.

- 5) En cada fila, se realiza el conteo de las casillas que tienen valor cero y se escribe en la columna “conteo de 0”. Esta columna luego se transpone (como fila) en la parte inferior de la matriz de cálculo para ser sumada con la fila de las valoraciones y dar así origen a la fila “suma de conteos”.
- 6) En cada casilla de la fila “*suma de valoraciones*” se coloca la sumatoria de los números de la columna correspondiente, que está por arriba de la diagonal de ceros.
- 7) Finalmente en la fila “*niveles de importancia*” se asignará los niveles según la suma de conteos; tal que, entre los indicadores evaluados el más *importante, urgente y obligatorio*, será aquel que menor valor tenga en la suma de conteos; por su parte, el menos urgente, menos importante y menos obligatorio será el de mayor valor.

#### ***Ejemplo de aplicación de la matriz de priorización***

La matriz de priorización empleada para el componente social del caso de estudio se representa en la tabla 10, en dicha tabla se trabaja con una matriz de  $6 \times 6$ , con la distribución de los subcomponentes sociales.

El resultado de priorización de las actividades a ser ejecutadas para mejorar la sostenibilidad del abastecimiento, según si son: Importantes, obligatorios y/o urgentes, sugiere el orden siguiente: Calidad, cobertura, cantidad, capacitación, concientización y atención.

El criterio de clasificación para ser ratificado, se recomienda que sea socializado con el equipo de gestión, operación y mantenimiento del abastecimiento.

No obstante, como explicación general, se plantean dos formas de selección prioritaria de actividades, 1) según aquella que posea el menor valor porcentual en el *ISA*; y, 2) según la subordinación presentada a través de la matriz de priorización, ambas válidas como instrumentos de apoyo a la planificación participativa.

## Conclusiones

El presente trabajo se desarrolló para brindar, mediante una herramienta metodológica, sencilla y técnicamente contundente, apoyo a la consecución y comprensión del camino a seguir (por parte de los gestores y operadores involucrados), para convertir en sostenible su actuación y a su empresa; y, al dar este primer paso, cognitivo - experimental mediante una propuesta práctica, se deja sentado que falta mucho camino por recorrer, pero al menos sabemos, ahora sí, a dónde queremos y debemos llegar, a corto, mediano y largo plazo.

Se colige, y bien que de manera breve, que al término de esta primera fase investigadora y propositiva se consigue sumar, con nuevos aportes, lo siguiente:

- 1) Herramienta para el diagnóstico de la sostenibilidad mediante indicador *ISEM*. Casos prácticos de aplicación en abastecimientos (*ISA*).
  - a. Método de pesos relativos y ponderados para calificar los niveles de sostenibilidad de cada componente (social, económico y ambiental).
  - b. Adaptación de 49 indicadores de sostenibilidad, agrupados en tres ejes, con sus respectivas funciones matemáticas y curvas de conversión a factores de calidad.

- c. Clasificación de empresas (abastecimientos), según su **ISEM** (ó **ISA**) y las medidas generales correctoras para buscar su mejora.
- 2) Metodología “matriz de prioridades relativas”, resultado de la combinación del análisis de prioridades *por pares* y el del *ABC*.
- 3) Según el valor del **ISEM** (ó **ISA**), es posible clasificar los abastecimientos y conocer su nivel de vulnerabilidad o patologías, en los tres pilares de la sostenibilidad (social, económico y ambiental). Así, se puede conocer los subcomponentes e indicadores que se encuentran en condiciones críticas o malas, deficientes, regulares, buenas y excelentes.
- 4) La metodología de diagnóstico **ISEM** (ó **ISA**) se aplicó a sistemas de abastecimiento de agua del Ecuador, constatándose su funcionalidad, su practicidad y versatilidad al aplicarlo.
- 5) Para la selección de alternativas se propuso un instrumento de fácil comprensión y flexible en su aplicación, este instrumento se apoya en una matriz triangular superior, que permite seleccionar (por *ABC* y por *pares*, al mismo tiempo) aquellas condiciones que sean urgentes, importantes y obligatorias, para mejorar su sostenibilidad.

### **Conclusiones del caso práctico**

- 1) De los resultados del diagnóstico (como caso práctico de aplicación y verificación de la metodología propuesta) se concluye que todos los abastecimientos investigados (catorce sistemas de suministro para los que se calculó su índice de sostenibilidad), tienen su **ISA** entre 20 y 45; clasificándolos como abastecimientos de sostenibilidad *deficiente* a cuatro de ellos y a diez de ellos con nivel de sostenibilidad *malo*.
- 2) Cinco de las catorce empresas investigadas que tienen un **ISA** mayor que 40, recuperan más del 60% de sus costos por ingresos propios, (facturación y venta de agua).

### **Recomendaciones**

Propuesta para los desarrollos futuros de la metodología **ISEM** (ó **ISA** para abastecimientos):

- a) Investigar mucho más de cerca y detallar las causas y efectos de los aspectos que afectan negativamente al crecimiento de la sostenibilidad en una empresa de servicio público (más concretamente en los abastecimientos de agua); y, luego plasmarlos en la matriz de medidas correctoras.
- b) Como ajustes al sistema en general, se recomienda tener más prácticas de selección de indicadores y plantear otra plataforma de distribución de importancias ponderadas en ellos, según corresponda a cada tipo de empresas de servicio público. Actividad que requiere de la participación comprometida de más expertos en el tema y de diferentes países.
- c) Es tarea necesaria además, pulir las entrevistas técnicas personales, o Delphi, para reajustar las funciones de conversión, así como la penalización por calidad.
- d) Como sustentos adicionales a la propuesta *ISEM* (ó *ISA*), se puede aplicarla en muchas otras ciudades de otros países y con los nuevos resultados que se obtengan, retroalimentar los aspectos cualitativos de la metodología.

Las dificultades encontradas para la aplicación de la propuesta se deben principalmente a que:

- a. Una gran mayoría de los sistemas de abastecimiento de agua potable del Ecuador no cuentan con la infraestructura mínima necesaria para practicar periódicamente medición, control y registro de caudales y presiones, ó calidad en línea.
- b. El no contar con redes sectorizadas ni equipadas para medición, es otra de las causas para no poder administrar y gestionar información confiable y verificable, por lo que los datos del subcomponente de infraestructura, cantidad, caudales, y pérdidas poseen muy poca fiabilidad.
- c. Gran parte de los gerentes administrativos, personal profesional y técnicos operadores de los sistemas de abastecimiento investigados desconocen, no todos, las metodologías que existen para la valoración de auditorías técnicas en su propia empresa o comparación con empresas homólogas o semejantes.

## Referencias

- Arana, E. (2002). "Resolución de acuerdo tarifario número 12". Consejo de Dirección del Instituto Nicaragüense de Acueductos y Alcantarillados, INAA. CD- RE-015-02: 7.
- Baldivieso, M. (2002). "Indicadores para la autoevaluación de instituciones de formación profesional inicial, en el marco de la nueva relación educación trabajo". Tesis doctoral. UAB. Barcelona - España.
- Benavides, H. (2010). "Diagnóstico de la sostenibilidad de un abastecimiento de agua e identificación de las propuestas que la mejoren". Tesis doctoral. Programa de Ingeniería Hidráulica y Medio Ambiente. UPV. Valencia - España.
- Cáceres, V. (2008). "Pago de pasivo laboral del SANAA impide municipalización del agua en el Distrito Central". Tegucigalpa, Unidad de Investigación de HRN: 2.
- CISDL. (2005). "¿Qué es Derecho del Desarrollo Sostenible?". Centre for International Sustainable Development Law. Artículo conceptual. Montreal.  
Disponibile en: [http://www.cisd.org/espanol/pdf/sustain\\_dev\\_es.pdf](http://www.cisd.org/espanol/pdf/sustain_dev_es.pdf)
- Macedo, B. (2005). El concepto de sostenibilidad. OREALC/2005/PI/H/12. Santiago de Chile, UNESCO - Oficina Regional de Educación para América Latina y el Caribe: 4.
- OSE - Observatorio de la Sostenibilidad en España. (2008). Informe temático "Sostenibilidad local. Una aproximación urbana y rural": 570. NIPO: 770-08-129-3. *Disponibile en:* [http://www.sostenibilidad-es.org/sites/default/files/\\_Informes/tematicos/sostenibilidad\\_local/sostenibilidad\\_local-esp.pdf](http://www.sostenibilidad-es.org/sites/default/files/_Informes/tematicos/sostenibilidad_local/sostenibilidad_local-esp.pdf)
- Pabón, L. (2007). "Cuestión de prioridades". Entropía. Madrid, Archivo de ideas: 10.
- Segger, C. & Khalfan, A. (2004). Sustainable Development Law: Principles, Practices & Prospects. CISDL, Oxford: Oxford University Press.
- UICN – Unión Mundial para la conservación. (2002). Evaluación de la sostenibilidad. Centro Internacional de Investigación para el Desarrollo – PADATA: 92.

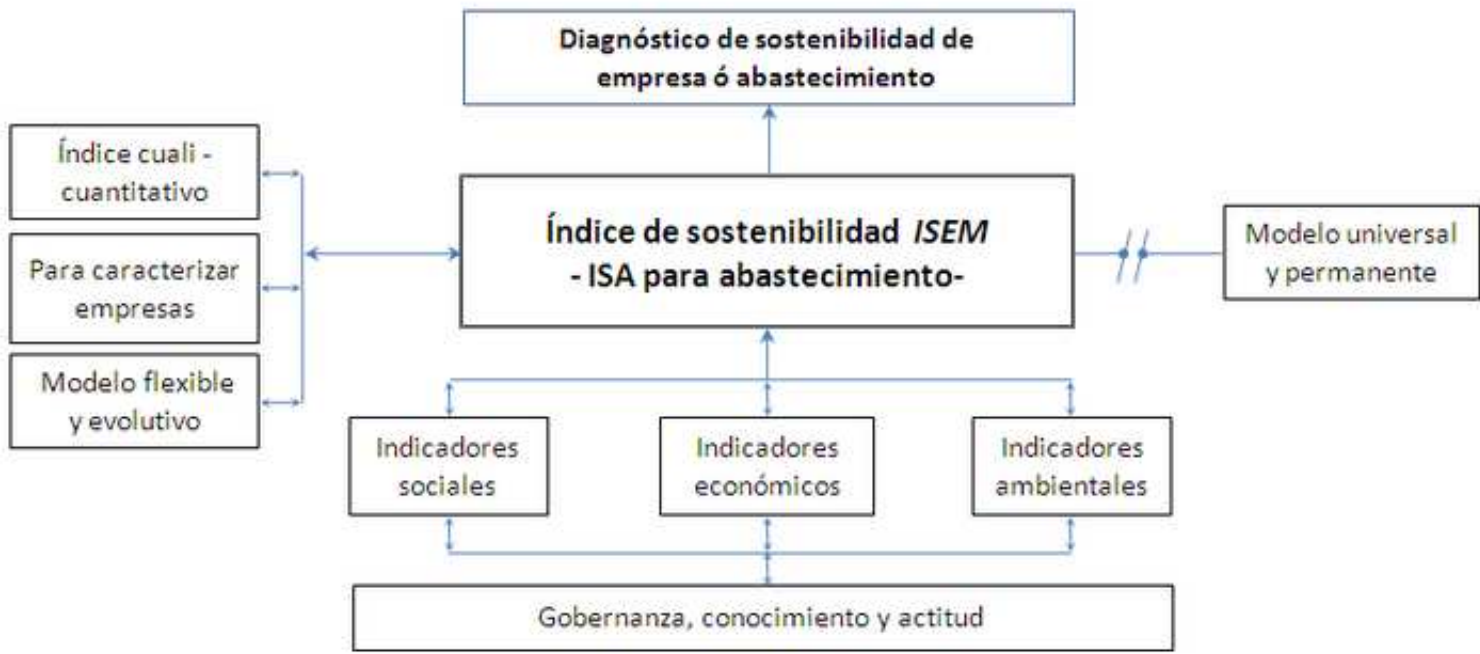

RETRACTED

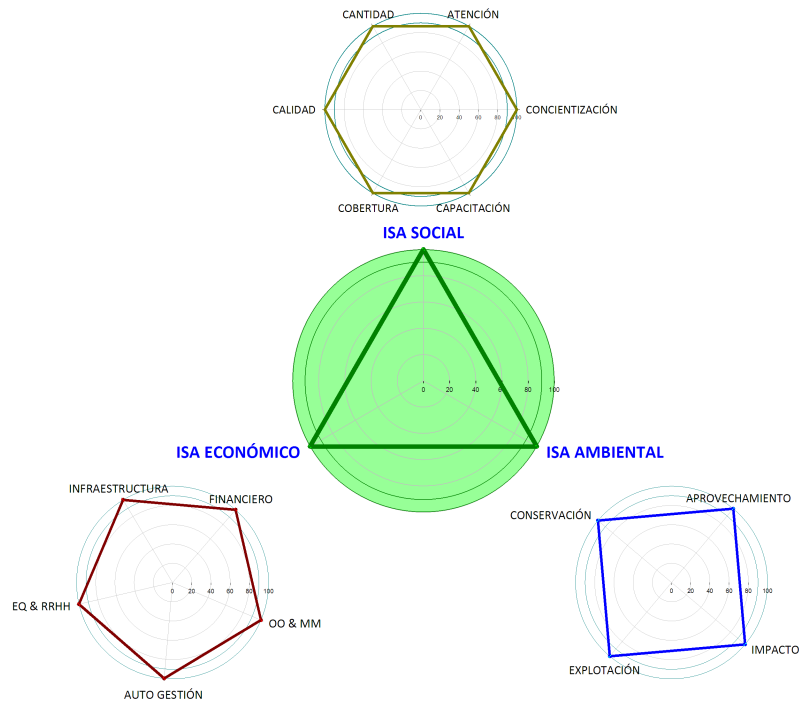

RETRACTED



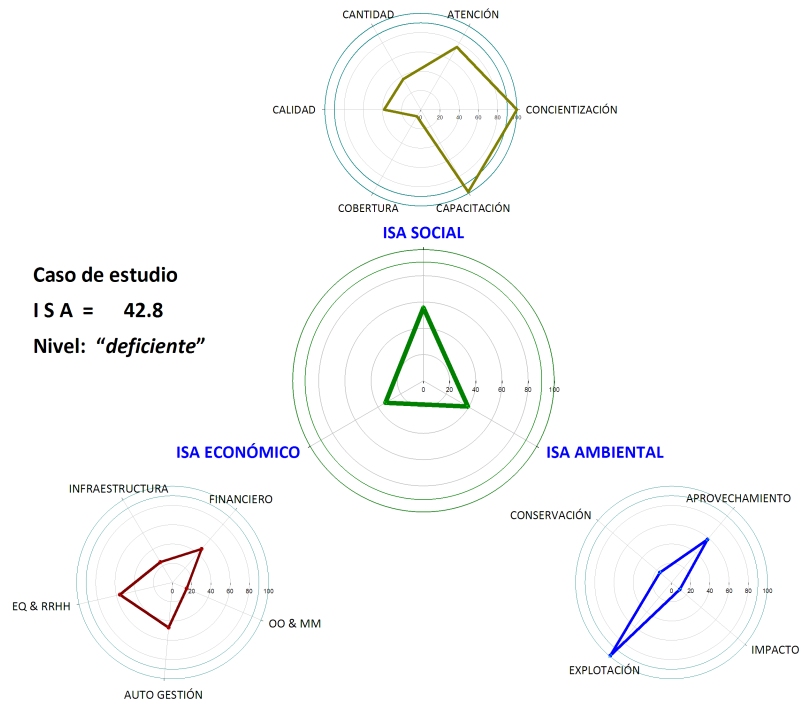

RETRACTED

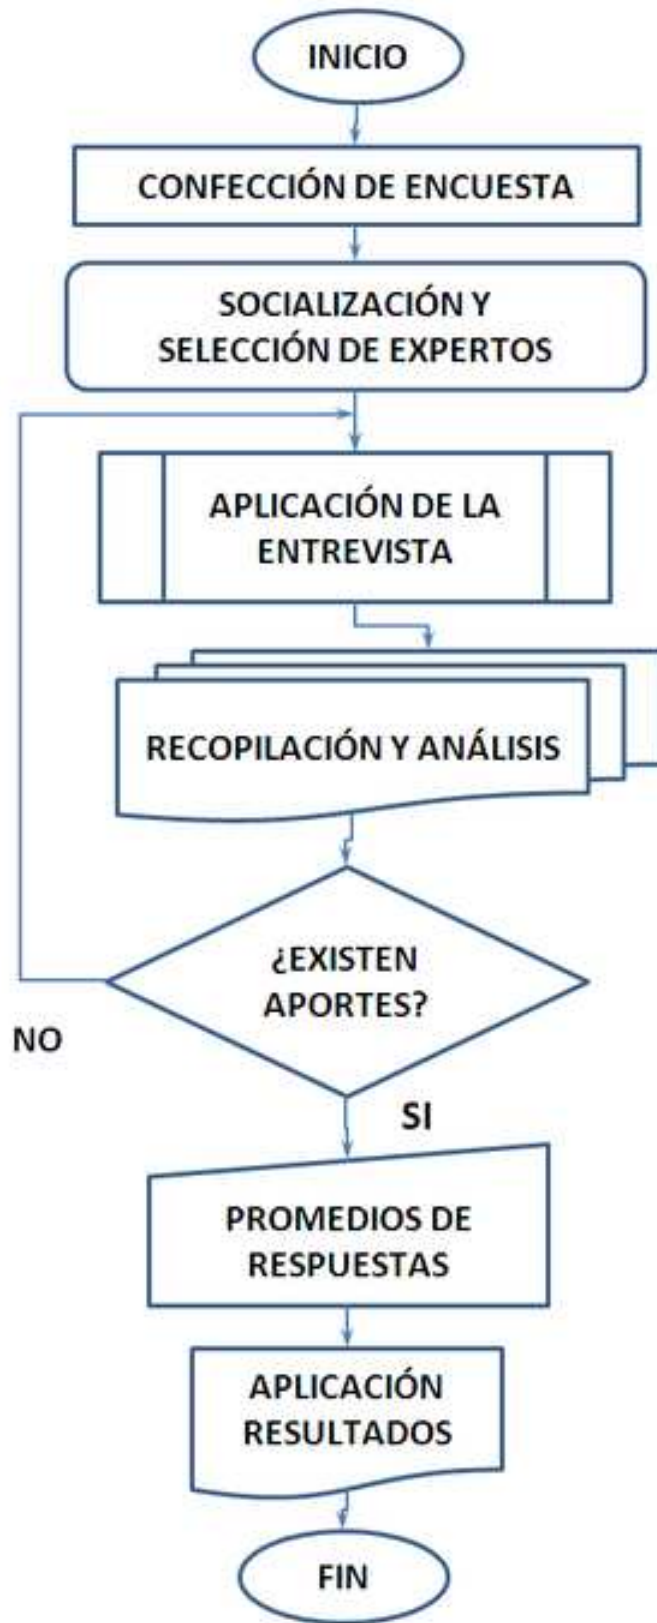

RETRACTED

|                                        | Valores del indicador | Factores de calidad |
|----------------------------------------|-----------------------|---------------------|
| ¿Cuánto es lo ideal y sostenible?      | X (1.0)               | 1.0                 |
|                                        | X (0.8)               | 0.8                 |
| ¿Cuánto es lo medianamente sostenible? | X (0.6)               | 0.6                 |
|                                        | X (0.4)               | 0.4                 |
| ¿Cuánto es lo mínimo considerado?      | X (0.2)               | 0.2                 |
|                                        | X (0.0)               | 0.0                 |

RETRACTED

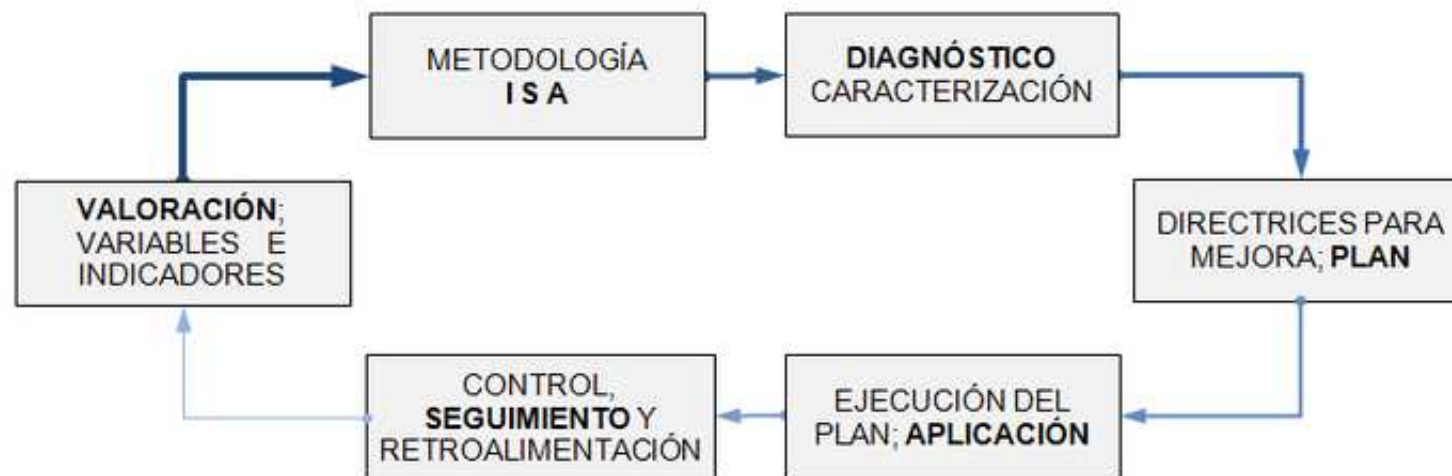

RETRACTED

Figure 07

Journal of Construction Engineering and Management. Submitted February 18, 2011; accepted August 15, 2011; posted ahead of print August 17, 2011. doi:10.1061/(ASCE)CO.1943-7862.0000470

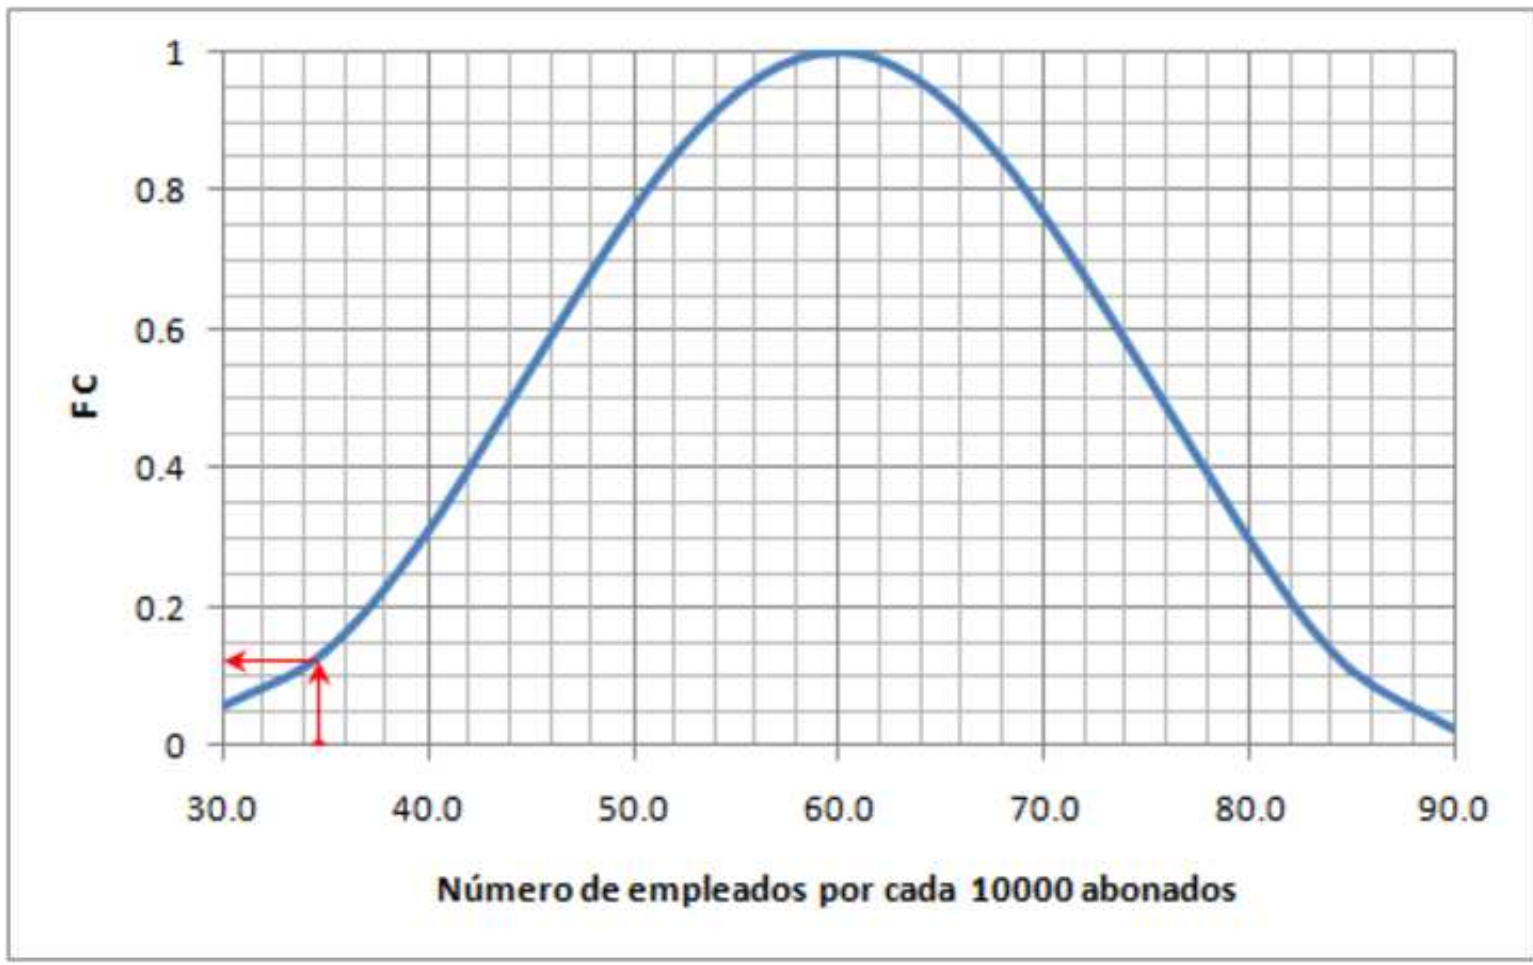

RETRACTED

Figure 08

Journal of Construction Engineering and Management. Submitted February 18, 2011; accepted August 15, 2011; posted ahead of print August 17, 2011. doi:10.1061/(ASCE)CO.1943-7862.0000470

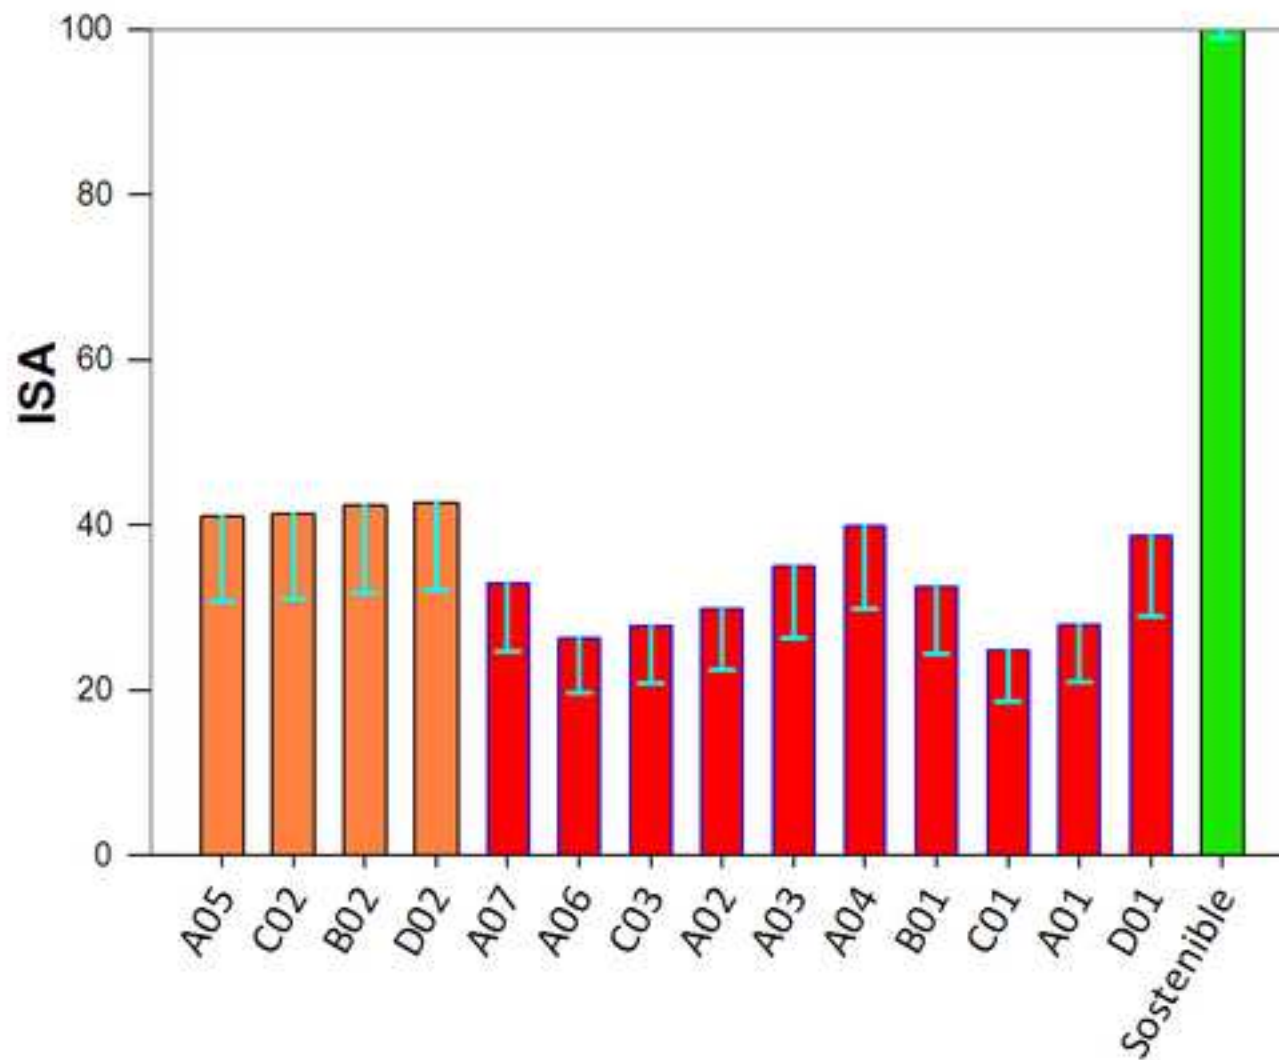

RETRACTED

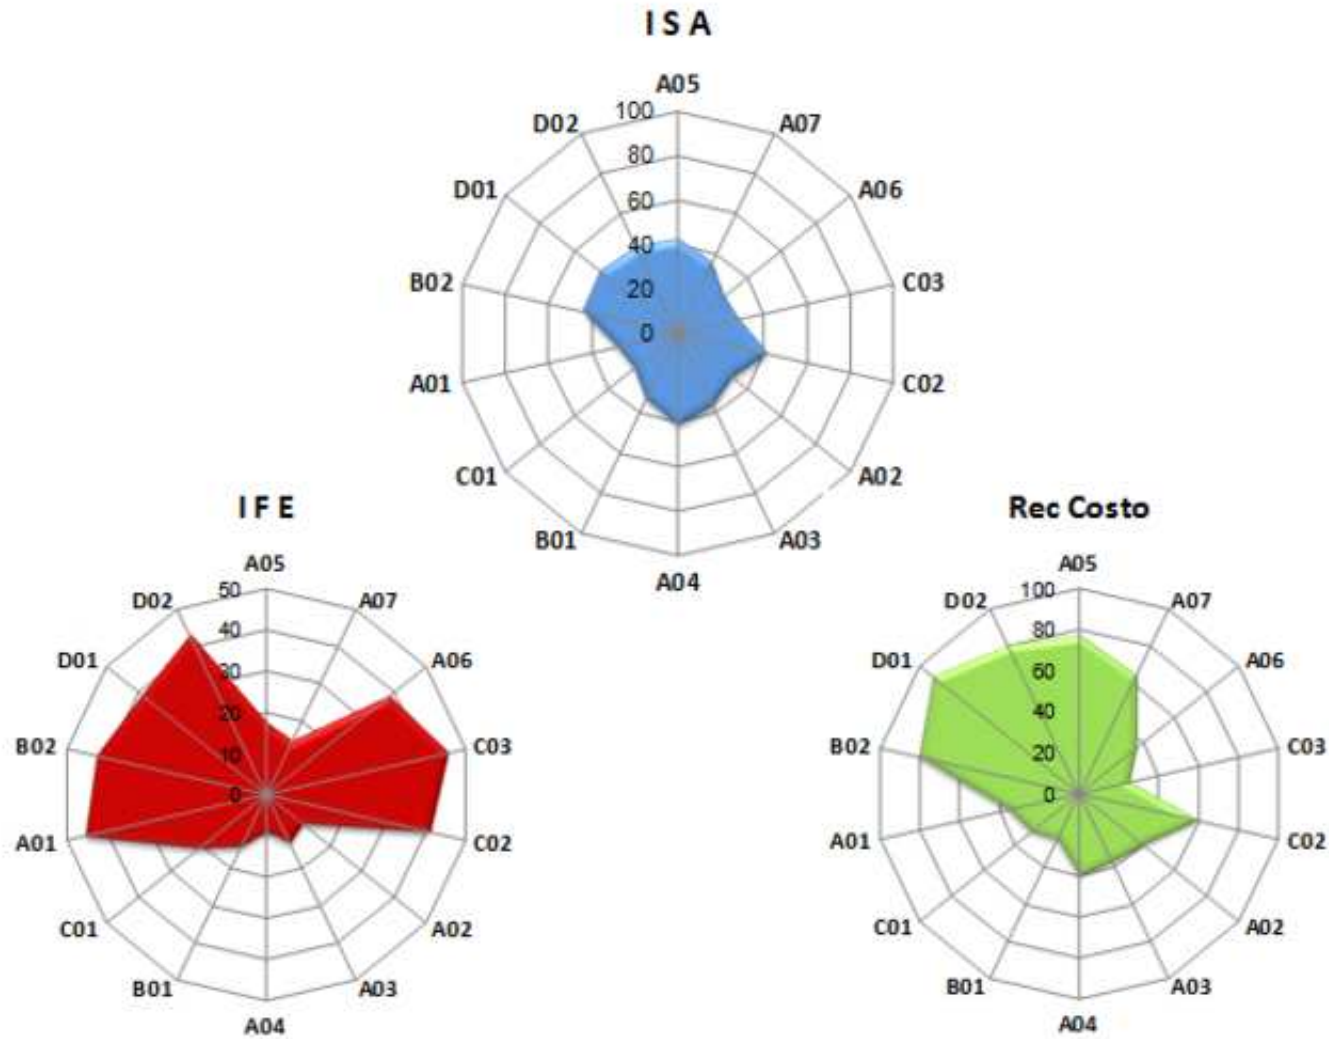

RETRACTED

| Nivel de sostenibilidad | Social |       | Económico |       | Ambiental |       |
|-------------------------|--------|-------|-----------|-------|-----------|-------|
|                         | Desde  | Hasta | Desde     | Hasta | Desde     | Hasta |
| <b>Malo</b>             | 0.00   | 13.32 | 0.00      | 13.32 | 0.00      | 13.32 |
| <b>Deficiente</b>       | 13.33  | 19.98 | 13.33     | 19.98 | 13.33     | 19.98 |
| <b>Regular</b>          | 19.99  | 24.98 | 19.99     | 24.99 | 19.99     | 24.98 |
| <b>Bueno</b>            | 24.99  | 29.97 | 25.00     | 29.98 | 24.99     | 29.97 |
| <b>Excelente</b>        | 29.98  | 33.30 | 29.99     | 33.40 | 29.98     | 33.30 |

*Tabla 1. Distribución de valores según las categorías de los niveles de sostenibilidad para un abastecimiento, por componente, según su ISA*

RETRACTED



| <b>Nivel de sostenibilidad</b> | <b>Desde</b> | <b>Hasta</b> |
|--------------------------------|--------------|--------------|
| <b>Malo</b>                    | 0.00         | 40.00        |
| <b>Deficiente</b>              | 40.01        | 60.00        |
| <b>Regular</b>                 | 60.01        | 75.00        |
| <b>Bueno</b>                   | 75.01        | 90.00        |
| <b>Excelente</b>               | 90.01        | 100.00       |

*Tabla 2. Distribución de valores según las categorías de los niveles de sostenibilidad para un abastecimiento, en función del valor de su ISA para su diagnóstico*

RETRACTED

| <b>Social (33.3)</b>                                                                                                                                                          | <b>Económico (33.4)</b>                                                                                                                                                                                                                                                          | <b>Ambiental (33.3)</b>                                                                                                                                                            |
|-------------------------------------------------------------------------------------------------------------------------------------------------------------------------------|----------------------------------------------------------------------------------------------------------------------------------------------------------------------------------------------------------------------------------------------------------------------------------|------------------------------------------------------------------------------------------------------------------------------------------------------------------------------------|
| <b>Operativo: cantidad (6.0)</b><br>(2.0) Reducciones de caudal<br>(2.0) Duración de interrupciones<br>(2.0) Presión de servicio                                              | <b>Autogestión (11.0)</b><br>(5.0) Recuperación de costos<br>(2.0) Autosuficiencia financiera<br>(1.0) Eficiencia en recaudación<br>(3.0) Agua no facturada                                                                                                                      | <b>Explotación y usos (7.0)</b><br>(4.0) Caudal de agua extraído<br>(3.0) Regulación legal en cuenca                                                                               |
| <b>Operativo: calidad (6.3)</b><br>(2.0) Número de análisis de calidad<br>(2.0) Estancamiento de agua<br>(2.3) Cloro residual                                                 | <b>Operación y mantenimiento (9.2)</b><br>(4.0) Índice de fugas estructural<br>(1.2) Roturas en tuberías<br>(1.0) Control acústico de fugas<br>(1.0) Información disponible en SIG<br>(1.0) Mantenimiento en depósitos<br>(1.0) Búsqueda de conex. ilícitas                      | <b>Consumo eficiente (5.3)</b><br>(2.0) Consumo per cápita<br>(1.3) Desaprovechamiento Rr. Hid.<br>(2.0) Consumo energético                                                        |
| <b>Operativo: cobertura (6.0)</b><br>(3.0) Predios conectados al sistema<br>(3.0) Cobertura en horas pico                                                                     | <b>Índices financieros (3.0)</b><br>(1.5) Porcentaje de liquidez<br>(1.5) Stock de deuda                                                                                                                                                                                         | <b>Contaminación por OO&amp;MM (8.0)</b><br>(3.0) Lodos de potabilización<br>(3.0) Depuración aguas servidas<br>(2.0) Mitigación de impactos                                       |
| <b>Formativo: capacitación (5.0)</b><br>(2.5) Técnicos de campo y planif.<br>(2.5) Administradores y coordinad.                                                               | <b>Infraestructura abastecimiento (8.2)</b><br>(1.0) Parcelas hidrométricas<br>(1.0) Número de hidrantes<br>(1.2) Renovación de collarines<br>(1.0) Contadores funcionando<br>(1.0) Edad de contadores domiciliar<br>(1.0) Vol. acumulado contadores<br>(2.0) Tuberías renovadas | <b>Conservación de fuente (13.0)</b><br>(2.5) Pertenencia cuencas fuente<br>(4.0) Reforestación en marcha<br>(2.5) Industrias limpias en cuenca<br>(4.0) Capital para conservación |
| <b>Formativo: concientización (4.0)</b><br>(2.0) Curso para clientes<br>(2.0) Tiempo campañas TV y radial                                                                     | <b>Equipamiento y personal (2.0)</b><br>(1.0) Acceso a maquinaria y equip.<br>(1.0) El personal y su rendimiento                                                                                                                                                                 |                                                                                                                                                                                    |
| <b>Comercial: atención al cliente (6.0)</b><br>(1.5) Atención de quejas<br>(1.5) Conexiones y reparaciones<br>(1.5) Difusión y marketing<br>(1.5) Infraestructura de atención |                                                                                                                                                                                                                                                                                  |                                                                                                                                                                                    |

**Tabla 3. Importancias ponderadas (IP). Resultados del caso de estudio**

RETRACTED

| Subcomponente                                              | Indicador                                                                                                     | Importancia ponderada | Valor del indicador | Factor de calidad | Peso relativo | %            |
|------------------------------------------------------------|---------------------------------------------------------------------------------------------------------------|-----------------------|---------------------|-------------------|---------------|--------------|
| <b>Subcomponente autogestión</b>                           |                                                                                                               | <b>11.0</b>           |                     |                   | <b>5.17</b>   | <b>47.03</b> |
| Variable: 1, 2, 3, 4 y 5                                   | % de recuperación de costos, mediante cobro de facturación por año de servicio                                | 5.0                   | 80.00               | 0.5125            | 2.56          |              |
| Variable: 1 y 2                                            | Autosuficiencia financiera = ingresos propios / gastos corrientes * 100                                       | 2.0                   | 60.00               | 0.7094            | 1.42          |              |
| Variable: 6 y 7                                            | Eficiencia en recaudación = emisión / recaudación * 100                                                       | 1.0                   | 80.00               | 0.5142            | 0.51          |              |
| Variable: 8 y 9                                            | % de agua no facturada / año                                                                                  | 3.0                   | 40.00               | 0.2261            | 0.68          |              |
| <b>Subcomponente de operación y mantenimiento</b>          |                                                                                                               | <b>9.2</b>            |                     |                   | <b>1.47</b>   | <b>15.98</b> |
| Variable: 10, 11, 12, ...15 y 16                           | Índice de fugas estructural (IFE)                                                                             | 4.0                   | 51.14               | 0.0000            | 0.00          |              |
| Variable: 17 y 11                                          | Número de roturas / km de tubería / año                                                                       | 1.2                   | 1.10                | 0.5680            | 0.68          |              |
| Variable: 18 y 11                                          | Número de inspecciones acústicas para control de fugas en la red / año                                        | 1.0                   | 0.00                | -0.0021           | 0.00          |              |
| Variable: 19, 11, 20 y 13                                  | % de información del abastecimiento disponible en una base de datos informática - SIG                         | 1.0                   | 55.00               | 0.6843            | 0.68          |              |
| Variable: 21 y 22                                          | % de superficie interior de depósitos de almacenamiento que son impermeabilizados y con mantenimiento por año | 1.0                   | 20.00               | 0.1040            | 0.10          |              |
| Variable: 23                                               | Búsqueda de conexiones ilegales (acústica y visual) en porcentaje de tuberías de la red / año                 | 1.0                   | 0.00                | 0.0000            | 0.00          |              |
| <b>Subcomponente de índices financieros</b>                |                                                                                                               | <b>3.0</b>            |                     |                   | <b>1.38</b>   | <b>46.08</b> |
| Variable: 24 y 2                                           | % de liquidez = Ingresos Corrientes / Gastos Corrientes * 100                                                 | 1.5                   | 65.00               | 0.2537            | 0.38          |              |
| Variable: 25, 26, 27 y 28                                  | Stock de deuda = pasivo total / (ingreso total - fuente de financiamiento) * 100                              | 1.5                   | 70.00               | 0.6678            | 1.00          |              |
| <b>Subcomponente de infraestructura del abastecimiento</b> |                                                                                                               | <b>8.2</b>            |                     |                   | <b>2.02</b>   | <b>24.67</b> |
| Variable: 29 y 13                                          | Número de parcelas hidrométricas (subsectores o distritos hidrométricos) por cada 10000 conexiones            | 1.0                   | 1.00                | 0.0116            | 0.01          |              |
| Variable: 30 y 11                                          | Número de hidrantes contra incendios operativos por cada 1.0 km de tubería                                    | 1.0                   | 0.03                | 0.0130            | 0.01          |              |
| Variable: 31 y 32                                          | % de renovación de collarines por año                                                                         | 1.2                   | 0.75                | 0.2315            | 0.28          |              |
| Variable: 33 y 34                                          | % contadores funcionan (instalados/conexiones*100)                                                            | 1.0                   | 80.00               | 0.4930            | 0.49          |              |
| Variable: 35 y 34                                          | % de contadores instalados más de 8 años                                                                      | 1.0                   | 22.60               | 0.2078            | 0.21          |              |
| Variable: 36 y 34                                          | % de contadores instalados cuyas lecturas superan los 4000 m <sup>3</sup>                                     | 1.0                   | 0.10                | 1.0000            | 1.00          |              |
| Variable: 37 y 11                                          | % de tuberías renovadas o repuestas por año                                                                   | 2.0                   | 0.01                | 0.0100            | 0.02          |              |
| <b>Subcomponente de equipamiento y personal</b>            |                                                                                                               | <b>2.0</b>            |                     |                   | <b>1.13</b>   | <b>56.25</b> |
| Variable: 38 y 39                                          | Porcentaje de maquinaria y equipo financiados (horas / mes) para OO&MM                                        | 1.0                   | 100.00              | 0.9993            | 1.00          |              |
| Variable: 40 y 13                                          | Número de empleados por cada 10000 abonados                                                                   | 1.0                   | 34.55               | 0.1258            | 0.13          |              |
| <b>Componente económico</b>                                |                                                                                                               | <b>33.4</b>           |                     |                   | <b>11.17</b>  | <b>33.46</b> |

Tabla 4 Ejemplo del cálculo del índice de sostenibilidad de abastecimiento, componente económico

$$PR_{\text{económico}} = 11.17 \sim 33.5\%$$

RETRACTED

| <b>Subcomponente</b>               | <b>%</b> |
|------------------------------------|----------|
| Autogestión                        | 47.0     |
| Operación y mantenimiento          | 16.0     |
| Índices financieros                | 46.1     |
| Infraestructura del abastecimiento | 24.7     |
| Equipamiento y personal            | 56.3     |

*Tabla 5 Valores porcentuales del ISA económico por subcomponentes para el ejemplo de cálculo*

RETRACTED

| Subcomponente                                                  | Indicador                                                                                                                  | Importancia ponderada | Valor del indicador | Factor de calidad | Peso relativo | %            |
|----------------------------------------------------------------|----------------------------------------------------------------------------------------------------------------------------|-----------------------|---------------------|-------------------|---------------|--------------|
| <b>Subcomponente operativo: cantidad</b>                       |                                                                                                                            | <b>6.0</b>            |                     |                   | <b>2.19</b>   | <b>36.58</b> |
| Variable: 41                                                   | Número de reducciones de la cantidad de caudal hasta un 50% por año                                                        | 2.0                   | 5.00                | 0.8254            | 1.65          |              |
| Variable: 42                                                   | Tiempo total acumulado, en horas, de duración de las interrupciones por año                                                | 2.0                   | 60.00               | 0.2721            | 0.54          |              |
| Variable: 43, 44 y 13                                          | % de acometidas con presión de servicio diferente al rango (entre 10 m c.a. y 50 m c.a.)                                   | 2.0                   | 22.00               | 0.0000            | 0.00          |              |
| <b>Subcomponente operativo: calidad</b>                        |                                                                                                                            | <b>6.3</b>            |                     |                   | <b>2.41</b>   | <b>38.29</b> |
| Variable: 45 y 46                                              | Número de análisis de calidad de agua por mes * 1000 / población servida                                                   | 2.0                   | 0.10                | 0.2060            | 0.41          |              |
| Variable: 47                                                   | Número promedio de horas por día que el agua permanece estancada (almacenada en depósitos del sistema) previo a su consumo | 2.0                   | 4.00                | 1.0000            | 2.00          |              |
| Variable: 48 y 49                                              | % de conexiones con un rango de cloro residual diferente al de la norma (0.1 mg/L y 0.5 mg/L)                              | 2.3                   | 8.000               | 0.0000            | 0.00          |              |
| <b>Subcomponente operativo: cobertura</b>                      |                                                                                                                            | <b>6.0</b>            |                     |                   | <b>0.49</b>   | <b>8.09</b>  |
| Variable: 50 y 51                                              | % de predios con conexión al sistema                                                                                       | 3.0                   | 62.33               | 0.1618            | 0.49          |              |
| Variable: 52 y 51                                              | % de predios bien servida en horas pico                                                                                    | 3.0                   | 20.00               | 0.0000            | 0.00          |              |
| <b>Subcomponente formativo: capacitación a empleados</b>       |                                                                                                                            | <b>5.0</b>            |                     |                   | <b>4.93</b>   | <b>98.67</b> |
| Variable: 53 y 54                                              | Número promedio de horas de capacitación invertidas en cada técnico de campo y miembros de planificación / año             | 2.5                   | 96.00               | 0.9735            | 2.43          |              |
| Variable: 55 y 56                                              | Número promedio de horas de capacitación invertidas en cada administrador y coordinador del abastecimiento / año           | 2.5                   | 96.00               | 1.0000            | 2.50          |              |
| <b>Subcomponente formativo: concientización a sus clientes</b> |                                                                                                                            | <b>4.0</b>            |                     |                   | <b>4.00</b>   | <b>100</b>   |
| Variable: 55 y 13                                              | horas de curso para clientes por c./ 10000 conex / año                                                                     | 2.0                   | 1920.00             | 1.0000            | 2.00          |              |
| Variable: 58 y 59                                              | Tiempo total, en minutos, de campaña radial o TV / mes                                                                     | 2.0                   | 13333.00            | 1.0000            | 2.00          |              |
| <b>Subcomponente comercial: atención al cliente</b>            |                                                                                                                            | <b>6.0</b>            |                     |                   | <b>4.50</b>   | <b>75</b>    |
| Variable: 60                                                   | Tiempo (en días) que la empresa tarda en responder las quejas de sus abonados                                              | 1.5                   | 1.00                | 1.0000            | 1.50          |              |
| Variable: 61, 62 y 63                                          | Tiempo (en días) en los que la empresa atiende nuevas conexiones, obras de reparación y reinstalación                      | 1.5                   | 0.94                | 1.0000            | 1.50          |              |
| Variable: 64                                                   | Se ejecuta un plan de marketing publicitario de la empresa, promoción al ahorro y difusión pública                         | 1.5                   | SI                  | 1.0000            | 1.50          |              |
| Variable: 65                                                   | Existe la infraestructura de atención al cliente organizada, equipada y cómoda                                             | 1.5                   | SI                  | 1.0000            | 1.50          |              |
| <b>Componente social</b>                                       |                                                                                                                            | <b>33.3</b>           |                     |                   | <b>18.53</b>  | <b>55.63</b> |

Tabla 6 Ejemplo del cálculo del índice de sostenibilidad de abastecimiento, componente social

$$PR_{social} = 18.53 \sim 55.6\%$$

RETRACTED

| Subcomponente                         | %     |
|---------------------------------------|-------|
| Operativo: cantidad                   | 36.6  |
| Operativo: calidad                    | 38.3  |
| Operativo: cobertura                  | 8.1   |
| Formativo: capacitación a empleados   | 98.7  |
| Formativo: concientización a clientes | 100.0 |
| Comercial: atención al cliente        | 75.0  |

*Tabla 7 Valores porcentuales del ISA social por subcomponentes para el ejemplo de cálculo*

RETRACTED

| Subcomponente                                                   | Indicador                                                                                                                                                                            | Importancia ponderada | Valor del indicador | Factor de calidad | Peso relativo | %            |
|-----------------------------------------------------------------|--------------------------------------------------------------------------------------------------------------------------------------------------------------------------------------|-----------------------|---------------------|-------------------|---------------|--------------|
| <b>Subcomponente explotación: del agua captada y vertida</b>    |                                                                                                                                                                                      | <b>7.0</b>            |                     |                   | <b>7.00</b>   | <b>100.0</b> |
| Variable: 66 y 67                                               | % de caudal de agua captado para el abastecimiento en época de estiaje                                                                                                               | 4.0                   | 3.00                | 1.0000            | 4.00          |              |
| Variable: 68                                                    | Existe estricto control legal y regulación efectiva de explotación de otros recursos y uso de suelo, en las cuencas fuente, por el gobierno local                                    | 3.0                   | SI                  | 1.0000            | 3.00          |              |
| <b>Subcomponente de Eficiencia consumos</b>                     |                                                                                                                                                                                      | <b>5.3</b>            |                     |                   | <b>3.08</b>   | <b>58.2</b>  |
| Variable: 70, 71, 16 (y 69)                                     | Cantidad promedio de consumo de agua por habitante por día                                                                                                                           | 2.0                   | 200.00              | 0.3121            | 0.62          |              |
| Variable: 72 y 73                                               | Desaprovechamiento de recursos hídricos                                                                                                                                              | 1.3                   | 38.10               | 0.3541            | 0.46          |              |
| Variable: 74 y 75                                               | Consumo energético relativo del abastecimiento por mes                                                                                                                               | 2.0                   | 1.00                | 1.0000            | 2.00          |              |
| <b>Subcomponente de contaminación ambiental por OO &amp; MM</b> |                                                                                                                                                                                      | <b>8.0</b>            |                     |                   | <b>0.90</b>   | <b>11.25</b> |
| Variable: 76 y 77                                               | Porcentaje de lodos y desechos generados por el sistema de potabilización (filtros, floculadores y sedimentadores) que se vierten sin depuración a cuerpos receptores, por año       | 3.0                   | 0.00                | 0.0000            | 0.00          |              |
| Variable: 78                                                    | Depuración de aguas servidas para los vertidos de alcantarillados de la ciudad                                                                                                       | 3.0                   | PARCIAL             | 0.3000            | 0.90          |              |
| Variable: 79                                                    | Aplicación de medidas correctoras o de mitigación para reducción de impacto por ruido, polvo y gases en apertura y cierre de zanjas para reparaciones o conexiones domiciliarias     | 2.0                   | NO                  | 0.0000            | 0.00          |              |
| <b>Subcomponente de conservación de la cuenca fuente</b>        |                                                                                                                                                                                      | <b>13.0</b>           |                     |                   | <b>2.07</b>   | <b>15.92</b> |
| Variable: 80 y 81                                               | Superficie de la cuenca fuente o tributaria que es propiedad del sistema en hectáreas por cada (L/s) de agua producida para el abastecimiento                                        | 2.5                   | 0.00                | 0.0000            | 0.00          |              |
| Variable: 82 y 83                                               | % de superficie de la o las cuencas tributarias que tienen en marcha un plan anual de silvicultura y reforestación, gestionado ó coordinado directamente por el operador del sistema | 4.0                   | 0.01                | 0.0000            | 0.00          |              |
| Variable: 84 y 85                                               | % de industrias y fábricas instaladas dentro de la superficie de la cuenca fuente, que depuran sus vertidos y controlan sus desechos correctamente                                   | 2.5                   | 90.00               | 0.8094            | 2.02          |              |
| Variable: 86 y 01                                               | % del ingreso facturado por venta de agua que se dedica a adquisición y conservación de cuencas tributarias                                                                          | 4.0                   | 0.01                | 0.0116            | 0.05          |              |
| <b>Componente ambiental</b>                                     |                                                                                                                                                                                      | <b>33.3</b>           |                     |                   | <b>13.05</b>  | <b>39.2</b>  |

**Tabla 8 Ejemplo del cálculo del índice de sostenibilidad de abastecimiento, componente ambiental**

$$PR_{\text{ambiental}} = 13.05 \sim 39.2\%$$

RETRACTED

| Subcomponente       | %     |
|---------------------|-------|
| Explotación de agua | 100.0 |
| Aprovechamiento     | 58.2  |
| Impacto ambiental   | 11.3  |
| Conservación        | 15.9  |

*Tabla 9 Valores porcentuales del ISA ambiental por subcomponentes para el ejemplo de cálculo*

RETRACTED



| Aspectos a ser priorizados     | Cantidad   | Capacitación | Concientización | Cobertura | Calidad  | Atención  | Suma de valores | Conteo de 0 | Suma conteos |
|--------------------------------|------------|--------------|-----------------|-----------|----------|-----------|-----------------|-------------|--------------|
| <b>Cantidad</b>                | <b>0</b>   | 2            | 1               | 0         | 0        | 2         | 5               | 3           | 8            |
| <b>Capacitación</b>            |            | <b>0</b>     | 3               | 0         | 0        | 1         | 4               | 3           | 7            |
| <b>Concientización</b>         |            |              | <b>0</b>        | 0         | 0        | 1         | 1               | 3           | 4            |
| <b>Cobertura</b>               |            |              |                 | <b>0</b>  | 0        | 2         | 2               | 2           | 4            |
| <b>Calidad</b>                 |            |              |                 |           | <b>0</b> | 2         | 2               | 1           | 3            |
| <b>Atención</b>                |            |              |                 |           |          | <b>0</b>  | 0               | 1           | 1            |
| <i>Suma de valoraciones</i>    | 0          | 2            | 4               | 0         | 0        | 8         | 14              |             |              |
| <i>Transpuesta conteo de 0</i> | 3          | 3            | 3               | 2         | 1        | 1         |                 | 13          |              |
| <i>Suma de conteos</i>         | 3          | 5            | 7               | 2         | 1        | 9         |                 |             | 27           |
| <b>Niveles de importancia</b>  | <b>III</b> | <b>IV</b>    | <b>V</b>        | <b>II</b> | <b>I</b> | <b>VI</b> |                 |             |              |

*Tabla 10 Matriz de selección de prioridades, subcomponentes sociales.- Ejemplo de aplicación*

RETRACTED
